# Supplementary material for: Lithium niobate on insulator: an emerging nanophotonic crystal for optimized light control
Source: publisher site journal article supplement (doi:10.3762/bjnano.15.114), 2024-11-14
Supplement: Additional file 1 [file 2190-4286-15-114-S1.pdf]

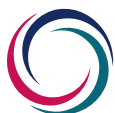

## Supporting Information

for

### **Lithium niobate on insulator: an emerging nanophotonic crystal for optimized light control**

Midhun Murali, Amit Banerjee and Tanmoy Basu

*Beilstein J. Nanotechnol.* **2024**, *15*, 1415–1426. [doi:10.3762/bjnano.15.114](https://doi.org/10.3762/bjnano.15.114)

## Supplementary information

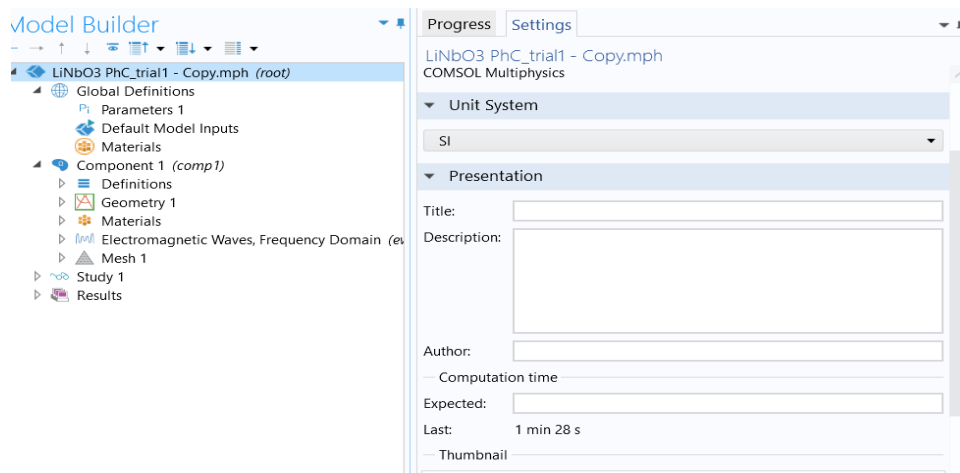

**Figure S1:** The hierarchical tree of COMSOL model builder.

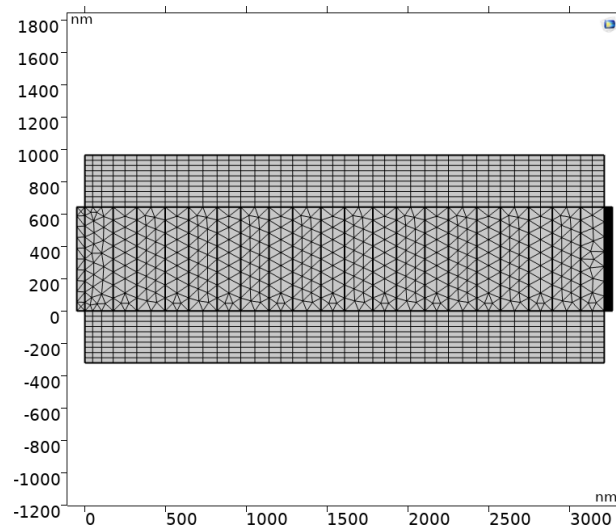

**Figure S2:** The customized triangular and rectangular mesh discretization on the PhC geometry built in COMSOL.

**Table S1:** Mesh parameters used.

|                         |                                                         |
|-------------------------|---------------------------------------------------------|
| Max Element Size        | TiO <sub>2</sub> - 94.2 nm, LN-84.3 nm,<br>Air-193.7 nm |
| Min Element Size        | 0.994 nm (for all)                                      |
| Max element growth rate | 1.3 (for all)                                           |
| Curvature Factor        | 0.3 (for all)                                           |
